# Supplementary material
Source: PubMed Central journal article supplement (PMC4344815)
Supplement: jipb0057-0198-sd1.pdf [file jipb0057-0198-sd1.pdf]

# Supplemental Figures

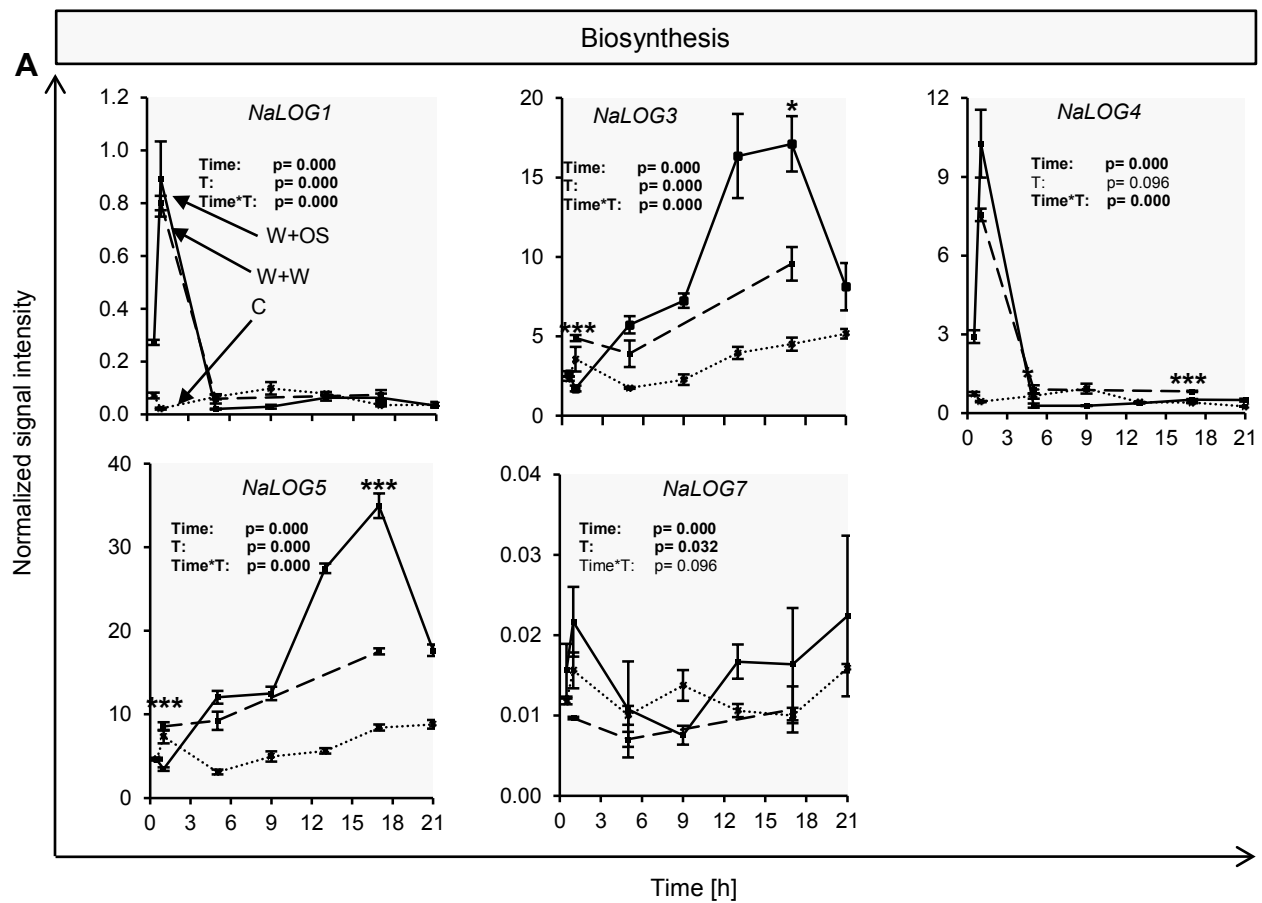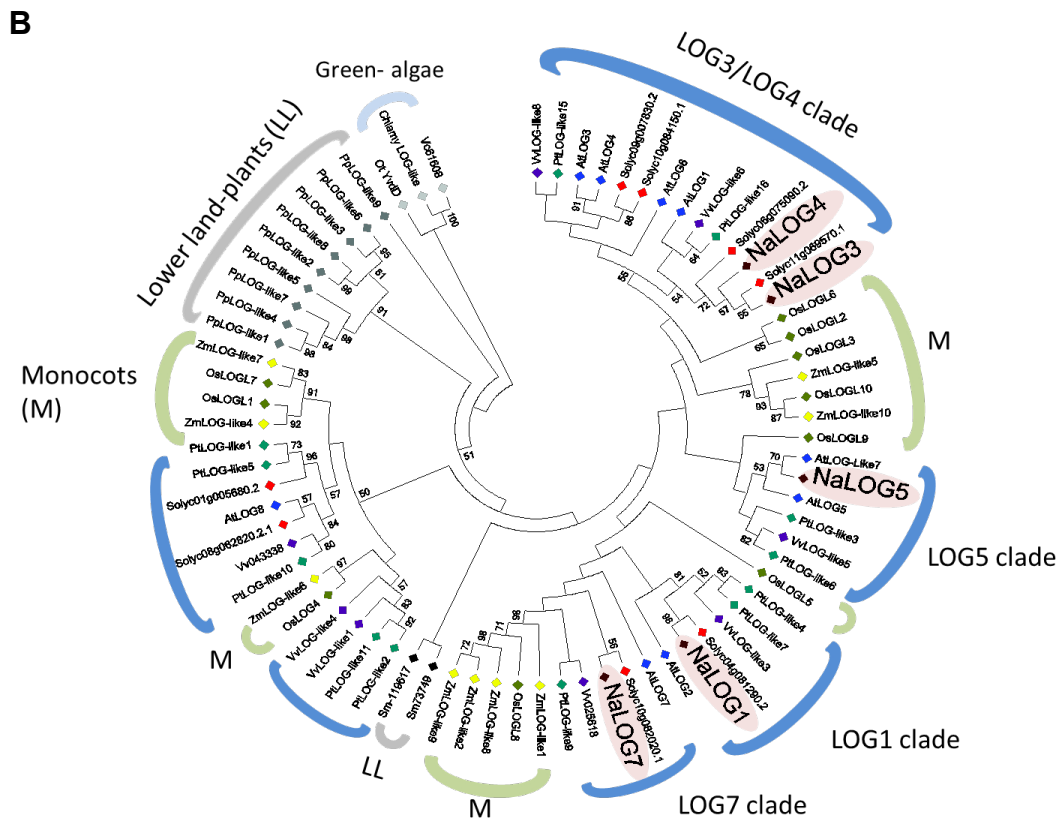

**Figure S1. Wounding and herbivory regulate the expression of LOG-family genes.**

**(A)** Relative transcript levels of cytokinin nucleoside 5' -monophosphate phosphoribohydrolases (LOG) were measured in leaves of *N. attenuata* at different time points after wounding and application of water (W+W; dashed line; 1, 5 and 17 h) or *M. sexta* oral secretions (W+OS; solid line; 0.5, 1, 5, 9, 13, 17 and 21 h) to the puncture wounds, as well as in untreated control leaves (C; dotted line; 0.5, 1, 5, 9, 13, 17 and 21 h). Time and treatment (C and W+OS; T) effects and their interaction (Time\*T) were analyzed by univariate ANOVA, except for *NaLOG3*, *NaLOG4* and *NaLOG7* data which were analyzed by a generalized least squares model. Asterisks indicate significant differences between W+W and W+OS-treated samples at the same time point (independent samples *t* test: \*  $P \leq 0.05$ , \*\*\*  $P \leq 0.001$ ). Error bars are standard errors (N=3). Data are obtained from microarray kinetic analysis.

**(B)** Phylogenetic analysis of these cytokinin related genes and their homologs in the following species groups (in parentheses the abbreviations and label colors): green algae [*Volvox carteri* (Vc), *Ostreococcus tauri* (Ot), *Chlamydomonas reinhardtii* (Chlamy); all in grey]; lower-land plants [*Physcomitrella patens* (Pp, dark grey) and *Selaginella mollendorffii* (Sm, black)]; monocots [*Oryza sativa* cv. *Japonica* (Os, light green) and *Zea mays* (Zm, yellow)] and dicots [*Vitis vinifera* (Vv, purple), *Solanum lycopersicum* (Solyc, red), *Arabidopsis thaliana* (At, blue) and *Populus trichocarpa* (Pt, dark green)]. For *N. attenuata* we used the abbreviation Na the label color brown and light red shading.

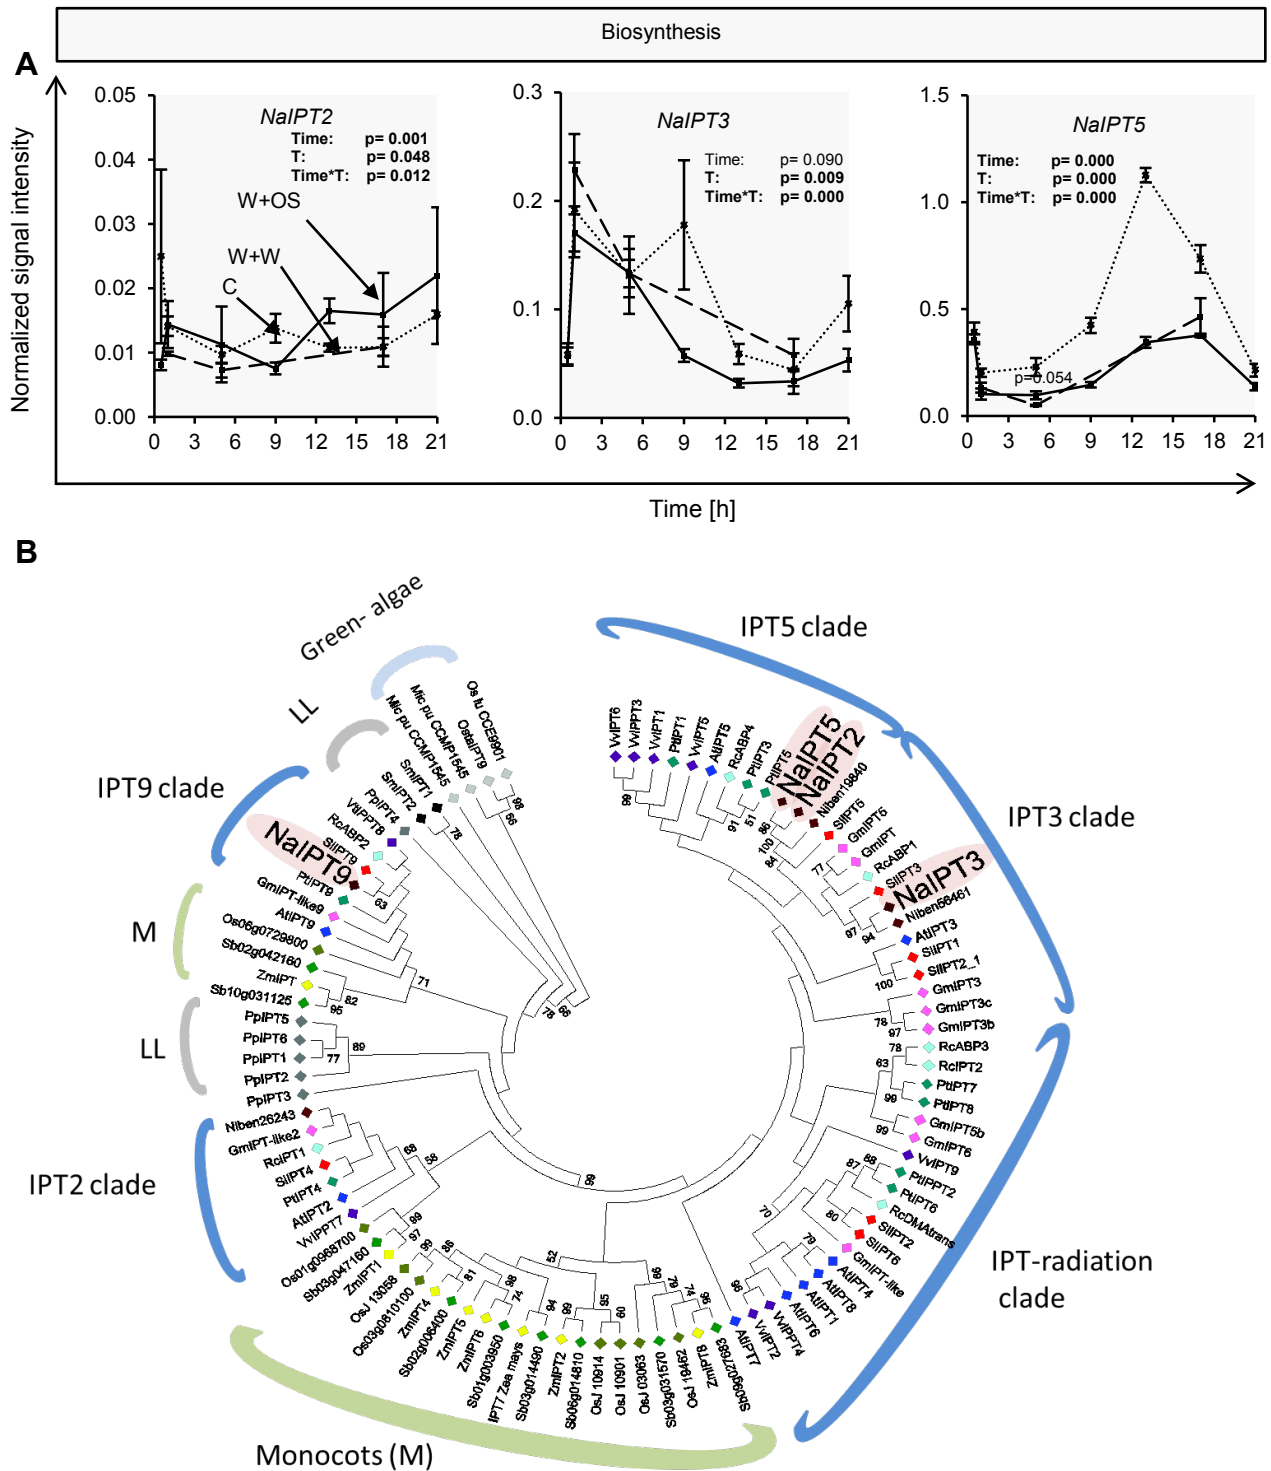

**Figure S2. Wounding and herbivory regulate the expression of IPT-family genes.**

**(A)** Relative transcript levels of isopentenyltransferases (IPT) were measured in leaves of *N. attenuata* at different time points after wounding and application of water (W+W; dashed line; 1, 5 and 17 h) or *M. sexta* oral secretions (W+OS; solid line; 0.5, 1, 5, 9, 13,

17 and 21 h) to the puncture wounds, as well as in untreated control leaves (C; dotted line; 0.5, 1, 5, 9, 13, 17 and 21 h). Time and treatment (C and W+OS; T) effects and their interaction (Time\*T) were analyzed by univariate ANOVA, except for *NaIPT1* data which were analyzed by a generalized least squares model. Error bars are standard errors (N=3). Data are obtained from microarray kinetic analysis.

**(B)** Phylogenetic analysis of these cytokinin related genes and their homologs in the following species groups (in parentheses the abbreviations and label colors): green algae [*Micromonas pusilla* (MicPu), *Ostreococcus lucimarinus* (Oslu) and *Ostreococcus tauri* (Osta), all in grey]; lower-land plants [*Physcomitrella patens* (Pp, dark grey) and *Selaginella mollendorffii* (Sm, black)]; monocots [*Oryza sativa* cv. *Japonica* (Os, light green), *Sorghum bicolor* (Sb, bright green) and *Zea mays* (Zm, yellow)] and dicots [*Vitis vinifera* (Vv, purple), *Solanum lycopersicum* (Sl, red), *Arabidopsis thaliana* (At, blue), *Glycine max* (Gm, pink), *Ricinus communis* (Rc, light blue) and *Populus trichocarpa* (Pt, dark green)]. For *N. attenuata* we used the abbreviation Na(light brown, light red shading) and for *N. benthamiana* Niben(dark brown).

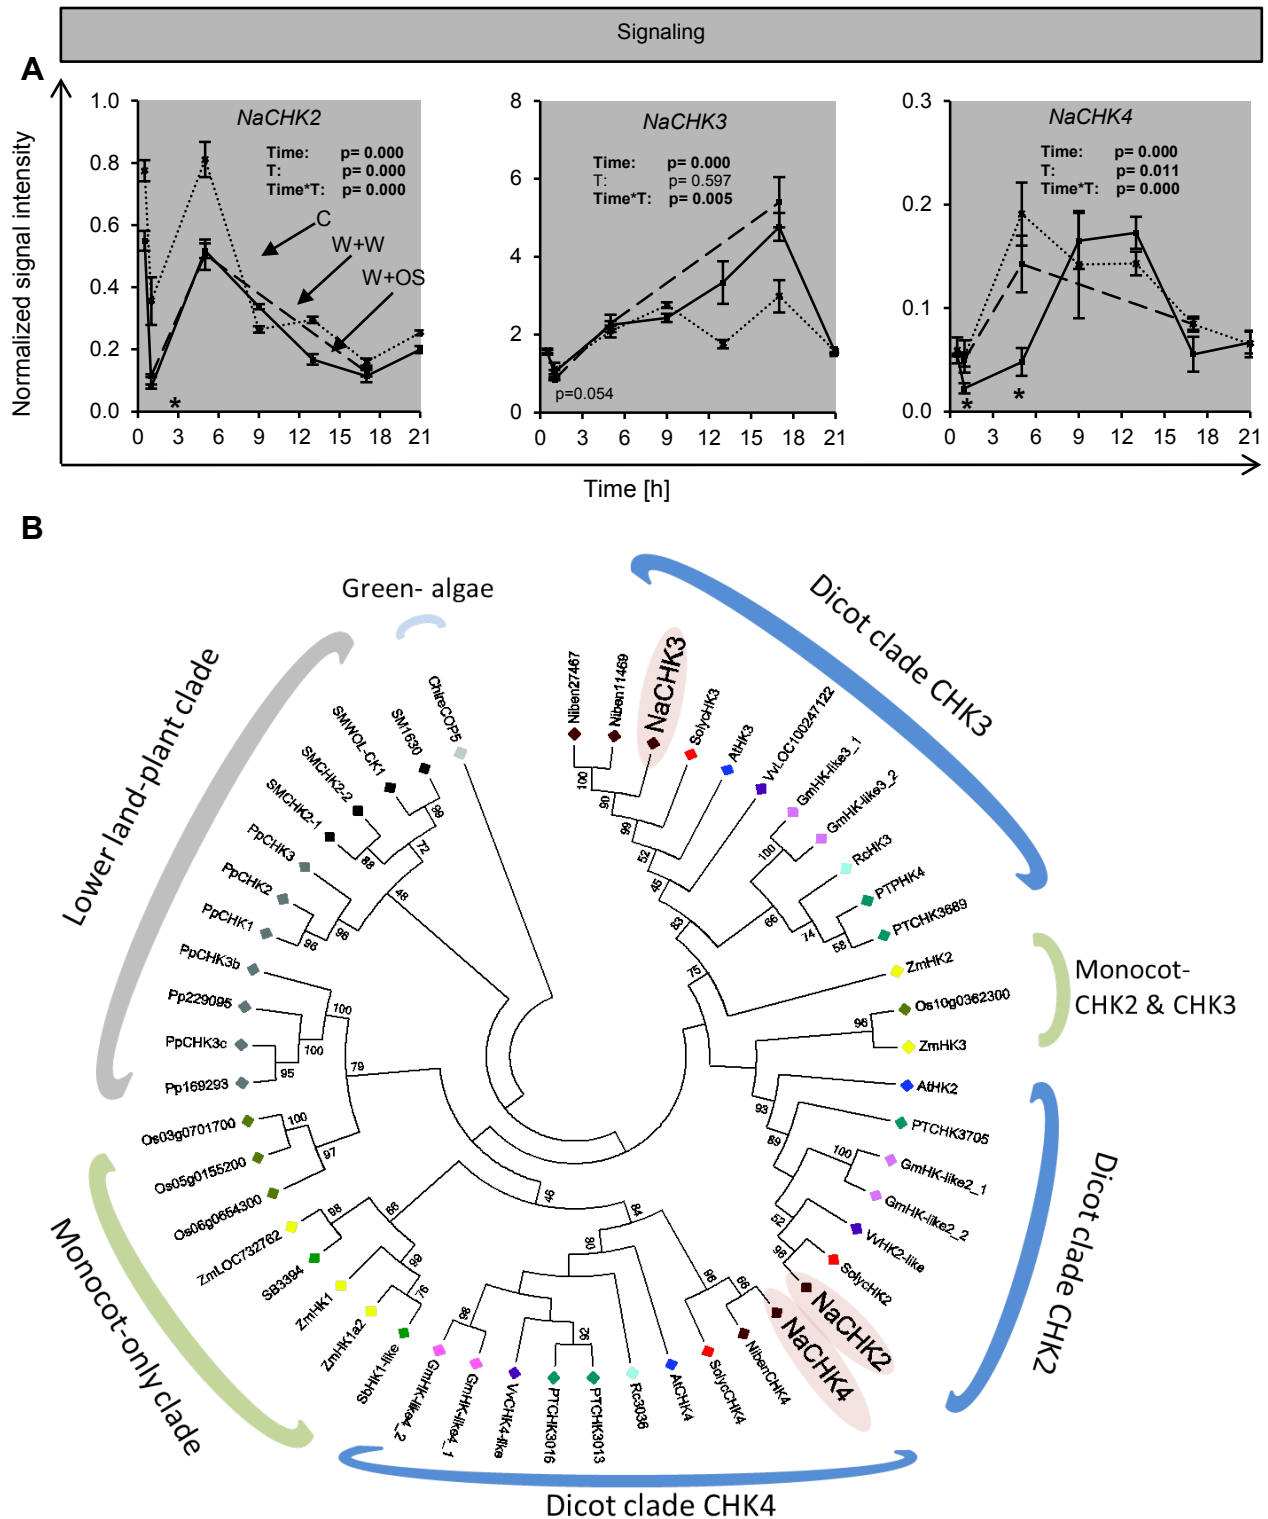

**Figure S3. Wounding and herbivory regulate the expression of cytokinin receptor genes.**

(A) Relative transcript levels of the corresponding histidine kinases were measured in leaves of *N. attenuata* at different time points after wounding and application of water

(W+W; dashed line; 1, 5 and 17 h) or *M. sexta* oral secretions (W+OS; solid line; 0.5, 1, 5, 9, 13, 17 and 21 h) to the puncture wounds, as well as in untreated control leaves (C; dotted line; 0.5, 1, 5, 9, 13, 17 and 21 h). Time and treatment (C and W+OS; T) effects and their interaction (Time\*T) were analyzed by univariate ANOVA, except for *NaCHK2* and *NaCHK3* data which were analyzed by a generalized least squares model. Asterisks indicate significant differences between W+W and W+OS-treated samples at the same time point (independent samples *t* test: \*  $P \leq 0.05$ ). Error bars are standard errors (N=3). Data are obtained from microarray kinetic analysis.

**(B)** Phylogenetic analysis of these cytokinin related genes and their homologs in the following species groups (in parentheses the abbreviations and label colors): the green alga *Chlamydomonas reinhardtii* (Chlre), (light grey); lower-land plants [*Physcomitrella patens* (Pp, dark grey) and *Selaginella mollendorffii* (Sm, black)]; monocots [*Oryza sativa* cv. *Japonica* (Os, light green), *Sorghum bicolor* (Sb, bright green) and *Zea mays* (Zm, yellow)] and dicots [*Vitis vinifera* (Vv, purple), *Solanum lycopersicum* (Solyc, red), *Arabidopsis thaliana* (At, blue), *Glycine max* (Gm, pink), *Ricinus communis* (Rc, light blue) and *Populus trichocarpa* (Pt, dark green)]. For *N. attenuata* we used the abbreviation Na(light brown, light red shading) and for *N. benthamiana* Niben (dark brown).

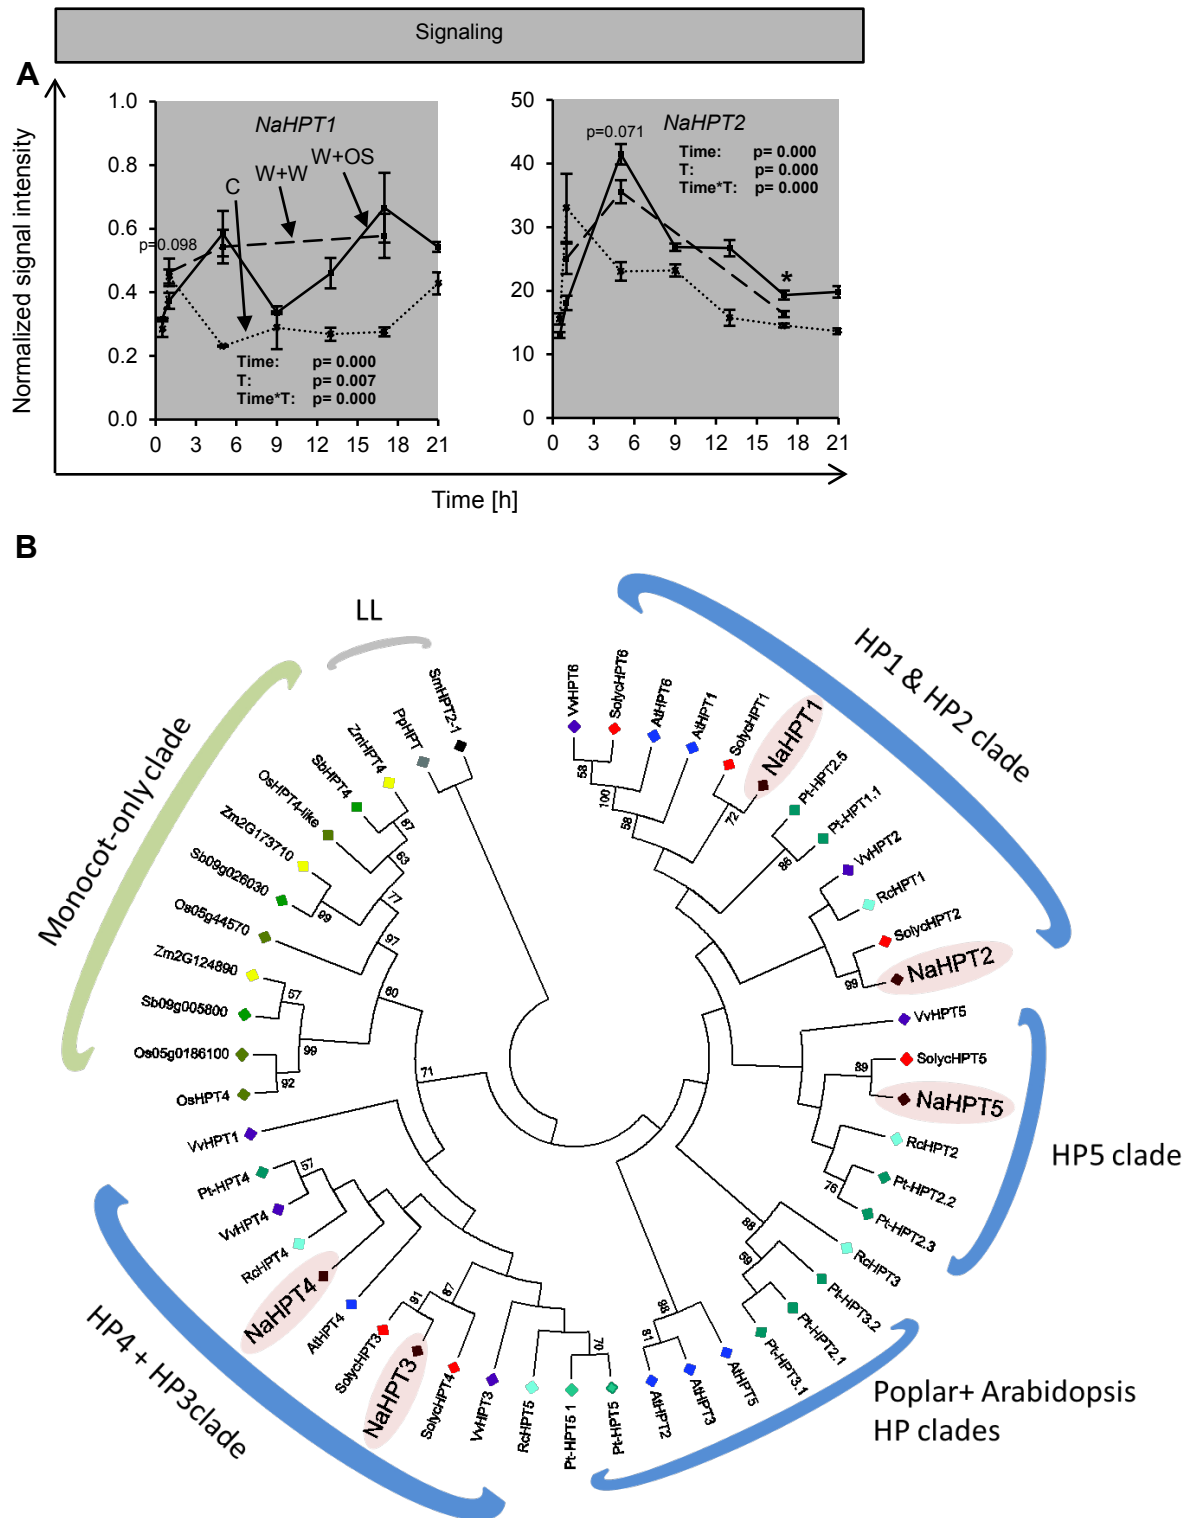

**Figure S4. Wounding and herbivory regulate the expression of HPT-family genes.** (A) Relative transcript levels of histidine phosphotranfer proteins (HPT) were measured in leaves of *N. attenuata* at different time points after wounding and application of water (W+W; dashed line; 1, 5 and 17 h) or *M. sexta* oral secretions (W+OS; solid line; 0.5, 1,



5, 9, 13, 17 and 21 h) to the puncture wounds, as well as in untreated control leaves (C; dotted line; 0.5, 1, 5, 9, 13, 17 and 21 h). Time and treatment (C and W+OS; T) effects and their interaction (Time\*T) were analyzed by a generalized least squares model. Asterisks indicate significant differences between W+W and W+OS-treated samples at the same time point (independent samples *t* test: \*  $P \leq 0.05$ ). Error bars are standard errors (N=3). Data are obtained from microarray kinetic analysis.

**(B)** Phylogenetic analysis of these cytokinin related genes and their homologs in the following groups of species (in parentheses the abbreviations and label colors): lower-land plants [*Physcomitrella patens* (Pp, dark grey) and *Selaginella mollendorffii* (Sm, black)]; monocots [*Oryza sativa* cv. *Japonica* (Os, light green), *Sorghum bicolor* (Sb, bright green) and *Zea mays* (Zm, yellow)] and dicots [*Vitis vinifera* (Vv, purple), *Solanum lycopersicum* (Solyc, red), *Arabidopsis thaliana* (At, blue), *Ricinus communis* (Rc, light blue) and *Populus trichocarpa* (Pt, dark green)]. For *N. attenuata* we used the abbreviation Na (light brown) and light red shading.

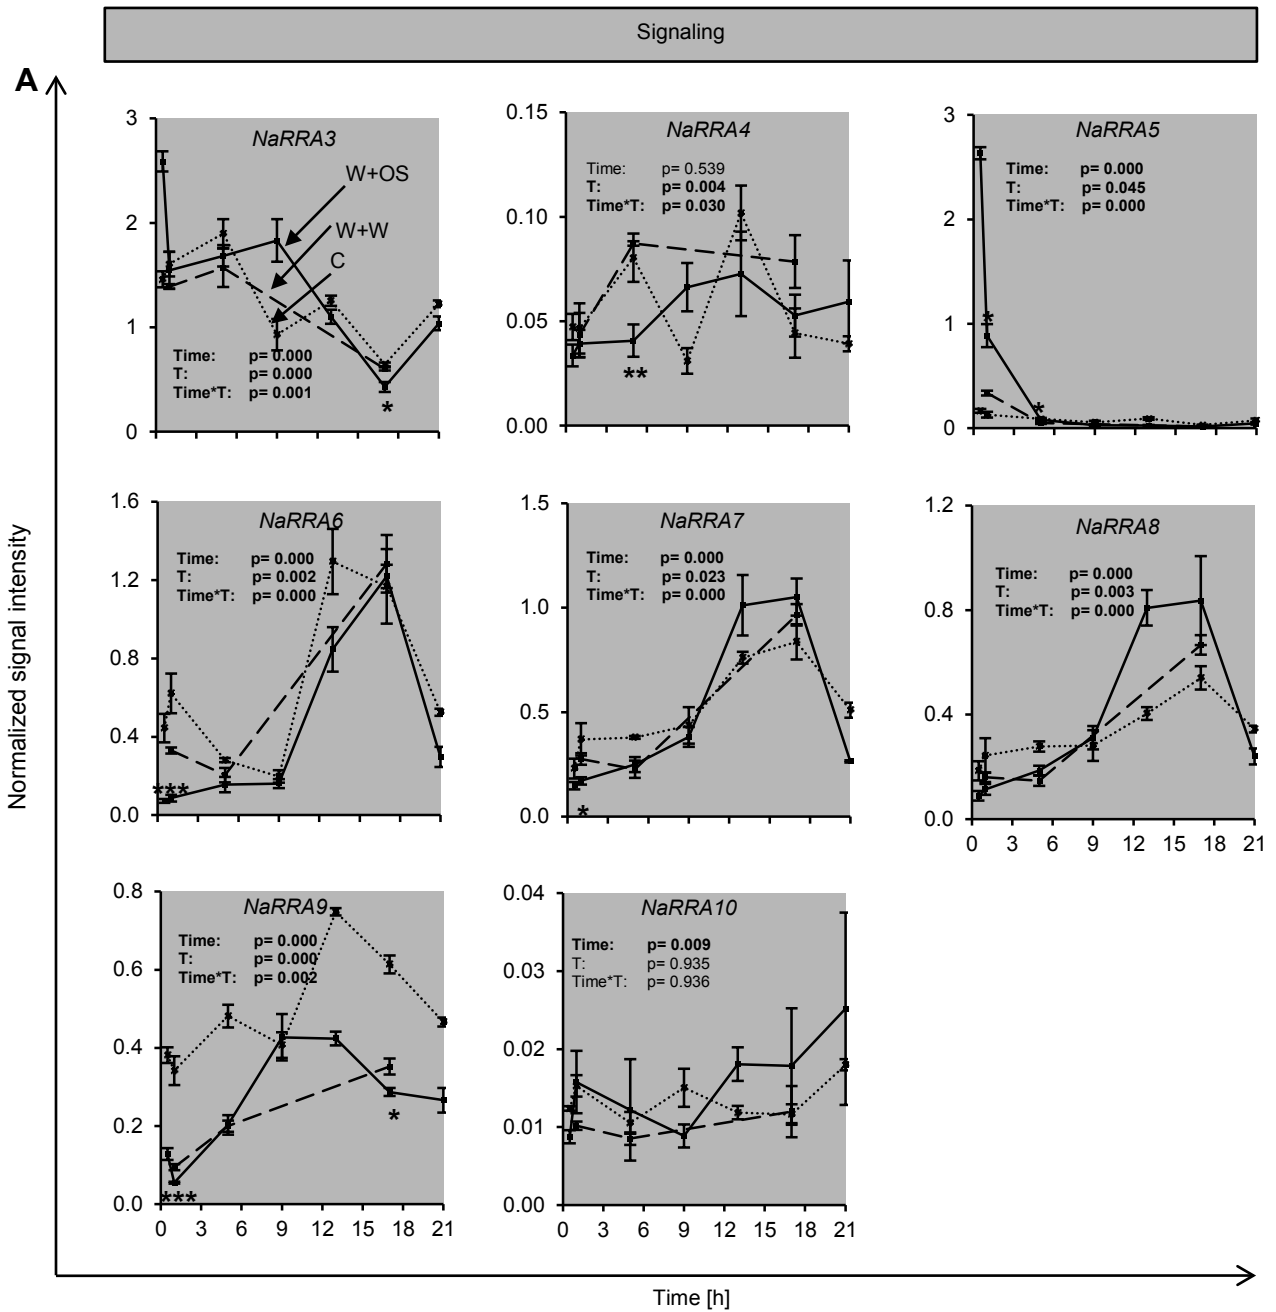

**B**

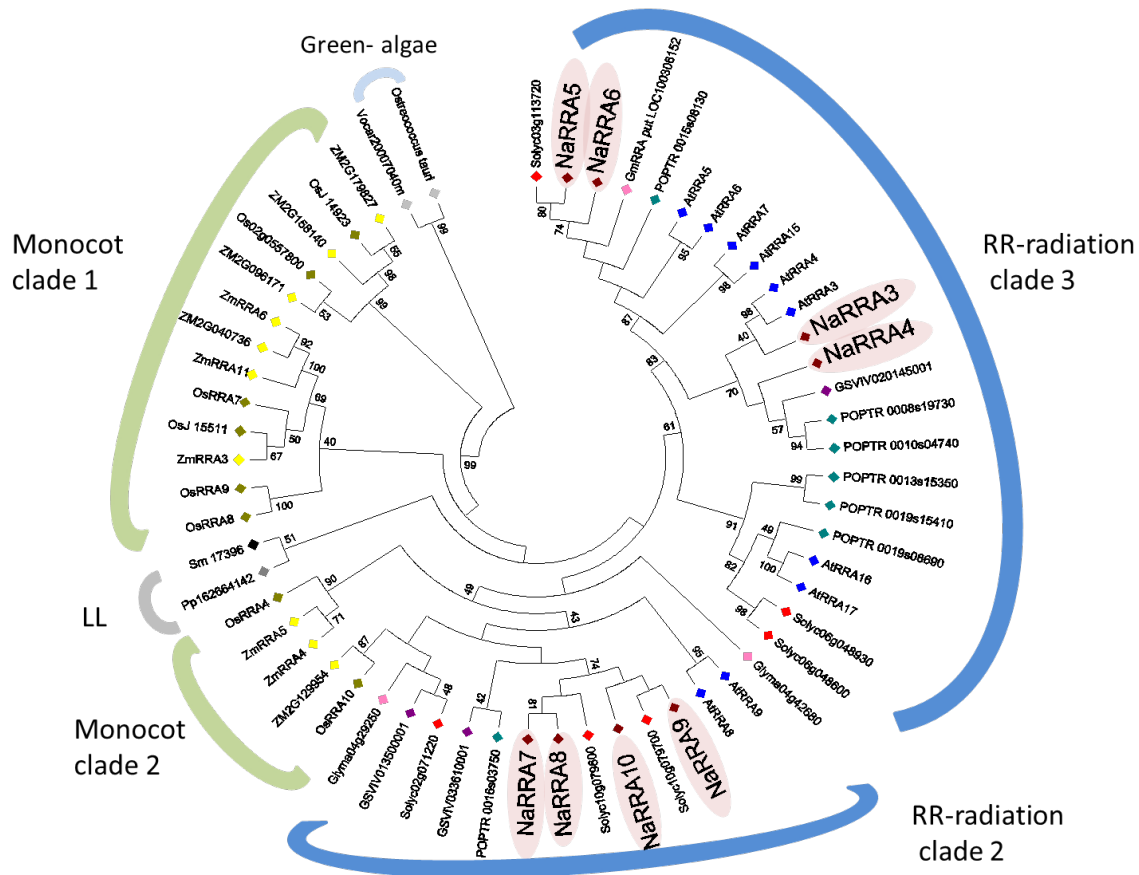

**Figure S5. Wounding and herbivory regulate the expression of type-A RR-family genes.**

**(A)** Relative transcript levels of type-A response regulators (RRA) were measured in leaves of *N. attenuata* at different time points after wounding and application of water (W+W; dashed line; 1, 5 and 17 h) or *M. sexta* oral secretions (W+OS; solid line; 0.5, 1, 5, 9, 13, 17 and 21 h) to the puncture wounds, as well as in untreated control leaves (C; dotted line; 0.5, 1, 5, 9, 13, 17 and 21 h). Time and treatment (C and W+OS; T) effects and their interaction (Time\*T) were analyzed by univariate ANOVA, except for *NaARRA3*, *NaARRA5*, *NaARRA6*, *NaARRA7*, *NaARRA8* and *NaARRA9* data which were analyzed by a generalized least squares model. Asterisks indicate significant differences between W+W and W+OS-treated samples at the same time point (independent samples *t* test: \*  $P \leq 0.05$ , \*\*  $P \leq 0.01$ , \*\*\*  $P \leq 0.001$ ). Error bars are standard errors (N=3). Data are obtained from microarray kinetic analysis.

**(B)** Phylogenetic analysis of these cytokinin related genes and their homologs in the following species groups (in parentheses the abbreviations and label colors): green algae [*Volvox carteri* (Vocar) and *Ostreococcus tauri*; all in grey]; lower-land plants [*Physcomitrella patens* (Pp, dark grey) and *Selaginella mollendorffii* (Sm, black)]; monocots [*Oryza sativa* cv. *Japonica* (Os, light green) and *Zea mays* (Zm, yellow)] and dicots [*Vitis vinifera* (GSV, purple), *Solanum lycopersicum* (Solyc, red), *Arabidopsis thaliana* (At, blue), *Glycine max* (Gm/Glyma, pink) and *Populus trichocarpa* (POPTR, dark green)]. For *N. attenuata* we used the abbreviation Na (light brown) and light red shading.



**Figure S6. Wounding and herbivory regulate the expression of type-B RR-family genes.**

**(A)** Relative transcript levels of type-B response regulators (RRB) were measured in leaves of *N. attenuata* at different time points after wounding and application of water (W+W; dashed line; 1, 5 and 17 h) or *M. sexta* oral secretions (W+OS; solid line; 0.5, 1, 5, 9, 13, 17 and 21 h) to the puncture wounds, as well as in untreated control leaves (C; dotted line; 0.5, 1, 5, 9, 13, 17 and 21 h). Time and treatment (C and W+OS; T) effects and their interaction (Time\*T) were analyzed by univariate ANOVA, except for *NaRRB2* and *NaRRB2b* data which were analyzed by a generalized least squares model.

Asterisks indicate significant differences between W+W and W+OS-treated samples at the same time point (independent samples *t* test: \*\*  $P \leq 0.01$ ). Error bars are standard errors (N=3). Data are obtained from microarray kinetic analysis.

**(B)** Phylogenetic analysis of these cytokinin related genes and their homologs in the following species (in parentheses the abbreviations and label colors): green algae [*Volvox carteri* (Vc), *Ostreococcus lucimarinus* (Oslu), *Ostreococcus tauri* (Osta), *Micromonas pusilla* (MicPu), all in grey]; lower-land plants [*Physcomitrella patens* (Pp, dark grey), *Selaginella mollendorffii* (Sm, black)]; monocots [*Oryza sativa* cv. *Japonica* (Os, light green), *Sorghum bicolor* (Sb, bright green) and *Zea mays* (Zm, yellow)] and dicots [*Vitis vinifera* (Vv, purple), *Arabidopsis thaliana* (At, blue), *Glycine max* (Gm, pink), *Ricinus communis* (Rc, light blue) and *Populus trichocarpa* (Pt, dark green)]. For *N. attenuata* we used the abbreviation Na(light brown) and for *N. tabacum* Nt (dark brown).



application of water (W+W; dashed line; 1, 5 and 17 h) or *M. sexta* oral secretions (W+OS; solid line; 0.5, 1, 5, 9, 13, 17 and 21 h) to the puncture wounds, as well as in untreated control leaves (C; dotted line; 0.5, 1, 5, 9, 13, 17 and 21 h). Time and treatment (C and W+OS; T) effects and their interaction (Time\*T) were analyzed by univariate ANOVA, except for *NaCKX5* and *NaCKX7* data which were analyzed by a generalized least squares model. Asterisks indicate significant differences between W+W and W+OS-treated samples at the same time point (independent samples *t* test: \*  $P \leq 0.05$ , \*\*  $P \leq 0.01$ , \*\*\*  $P \leq 0.001$ ). Error bars are standard errors (N=3). Data are obtained from microarray kinetic analysis.

**(B)** Phylogenetic analysis of these cytokinin related genes and their homologs in the following species (in parentheses the abbreviations and label colors): monocots [*Oryza sativa* cv. *Japonica* (Os, light green) and *Zea mays* (Zm, yellow)] and dicots [*Solanum lycopersicum* (Solyc, red), *Arabidopsis thaliana* (At, blue), *N. attenuata* (Na, light brown) and *N. benthamiana* (Niben, dark brown)]. The outgroup is a bacterial species (*Rhodococcus fascians*), as no homolog was found in another green plant outside flowering plants.



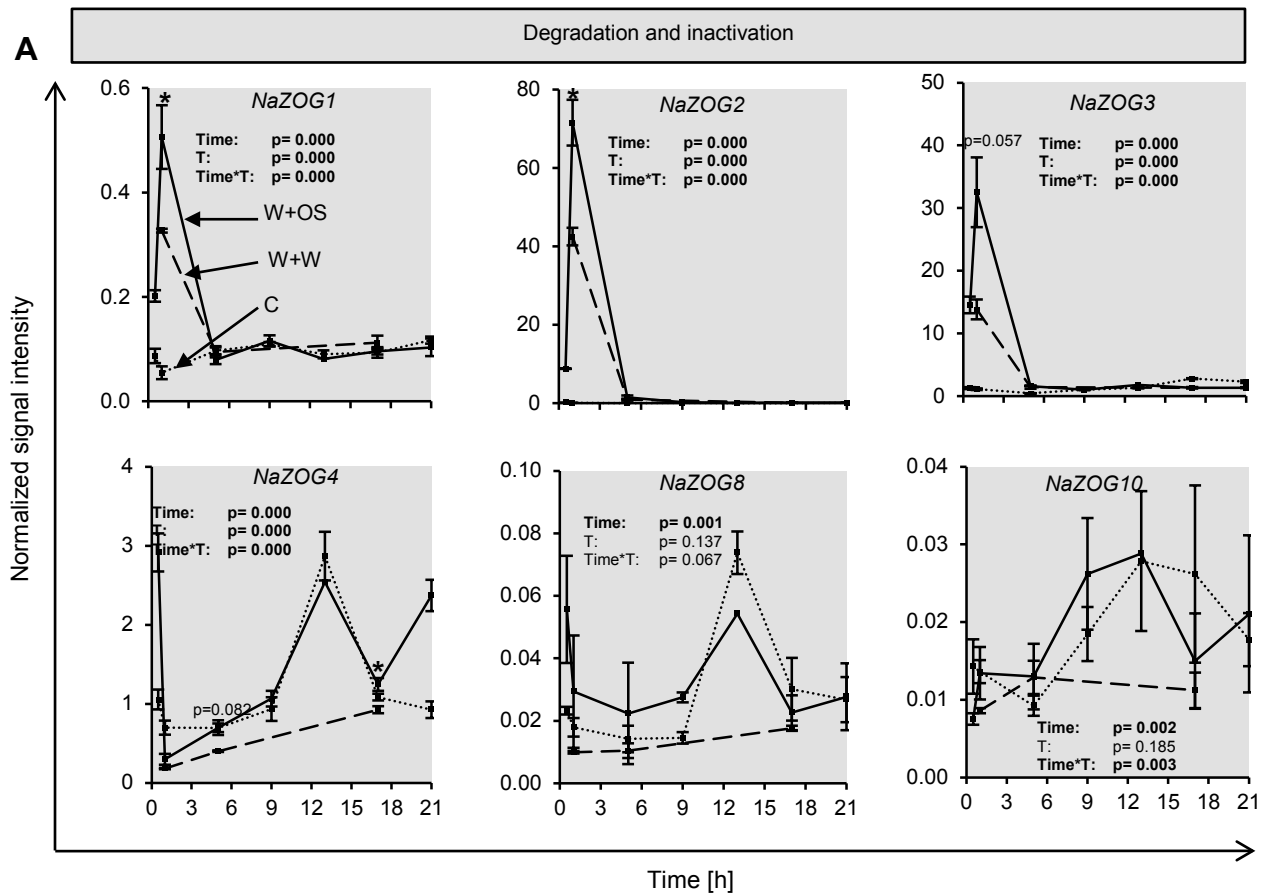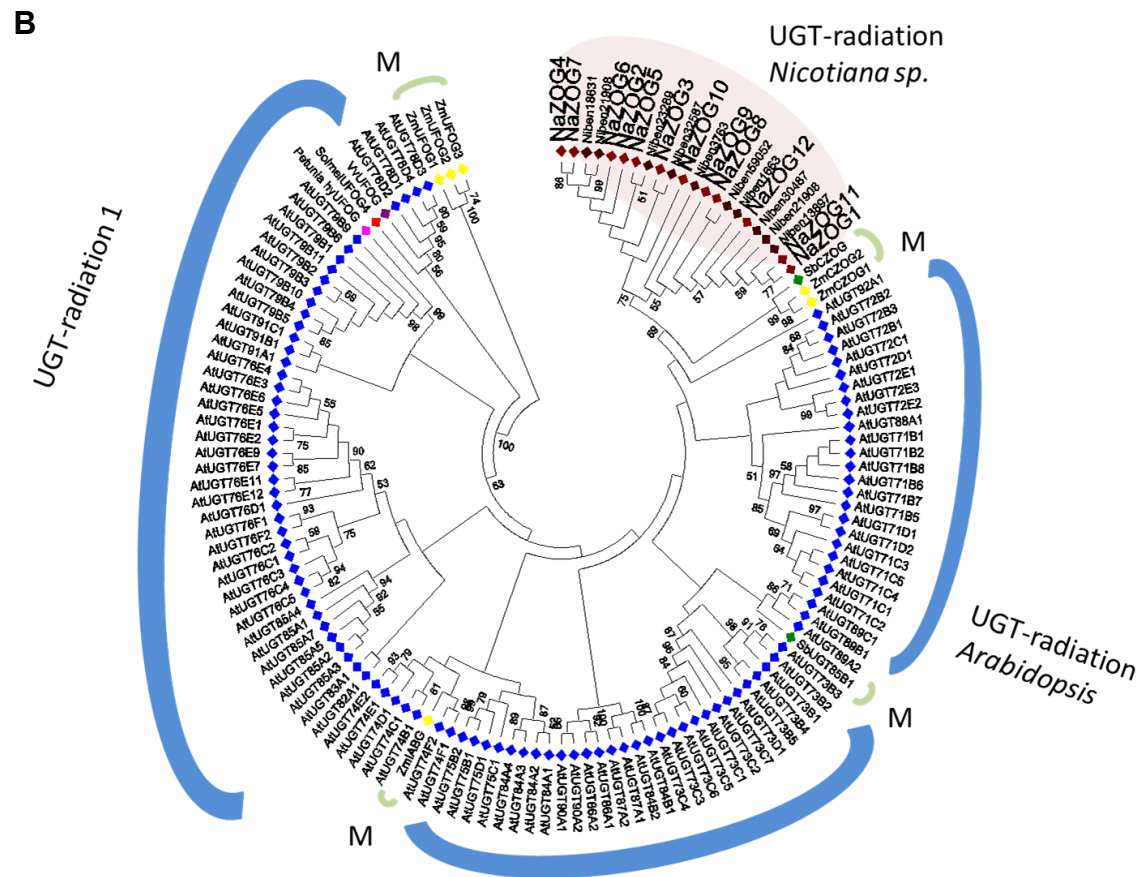

**Figure S8. Wounding and herbivory regulate the expression of ZOG-family genes.**

**(A)** Relative transcript levels of zeatin O-glucosyltransferase (ZOG) were measured in leaves of *N. attenuata* at different time points after wounding and application of water (W+W; dashed line; 1, 5 and 17 h) or *M. sexta* oral secretions (W+OS; solid line; 0.5, 1, 5, 9, 13, 17 and 21 h) to the puncture wounds, as well as in untreated control leaves (C; dotted line; 0.5, 1, 5, 9, 13, 17 and 21 h). Time and treatment (C and W+OS; T) effects and their interaction (Time\*T) were analyzed by univariate ANOVA, except for *NaZOG2*, *NaZOG8* and *NaZOG10* data which were analyzed by a generalized least squares model. Asterisks indicate significant differences between W+W and W+OS-treated samples at the same time point (independent samples *t* test: \*  $P \leq 0.05$ ). Error bars are standard errors (N=3). Data are obtained from microarray kinetic analysis. Only expression data of genes that are differentially regulated by treatments are presented.

**(B)** Phylogenetic analysis of these cytokinin related genes and their homologs in the following species (in parentheses the abbreviations and label colors): Monocots [*Sorghum bicolor* (Sb, bright green) and *Zea mays* (Zm, yellow)], dicots [*Vitis vinifera* (Vv, purple), *Solanum spp.* (Sol, red), *Arabidopsis thaliana* (At, blue) and *Petunia spp.* (pink)]. For *N. attenuata* we used the abbreviation Na(light brown), for *N. benthamiana* Niben(dark brown). No ZOG genes were identified in either lower-land plants or green algae.

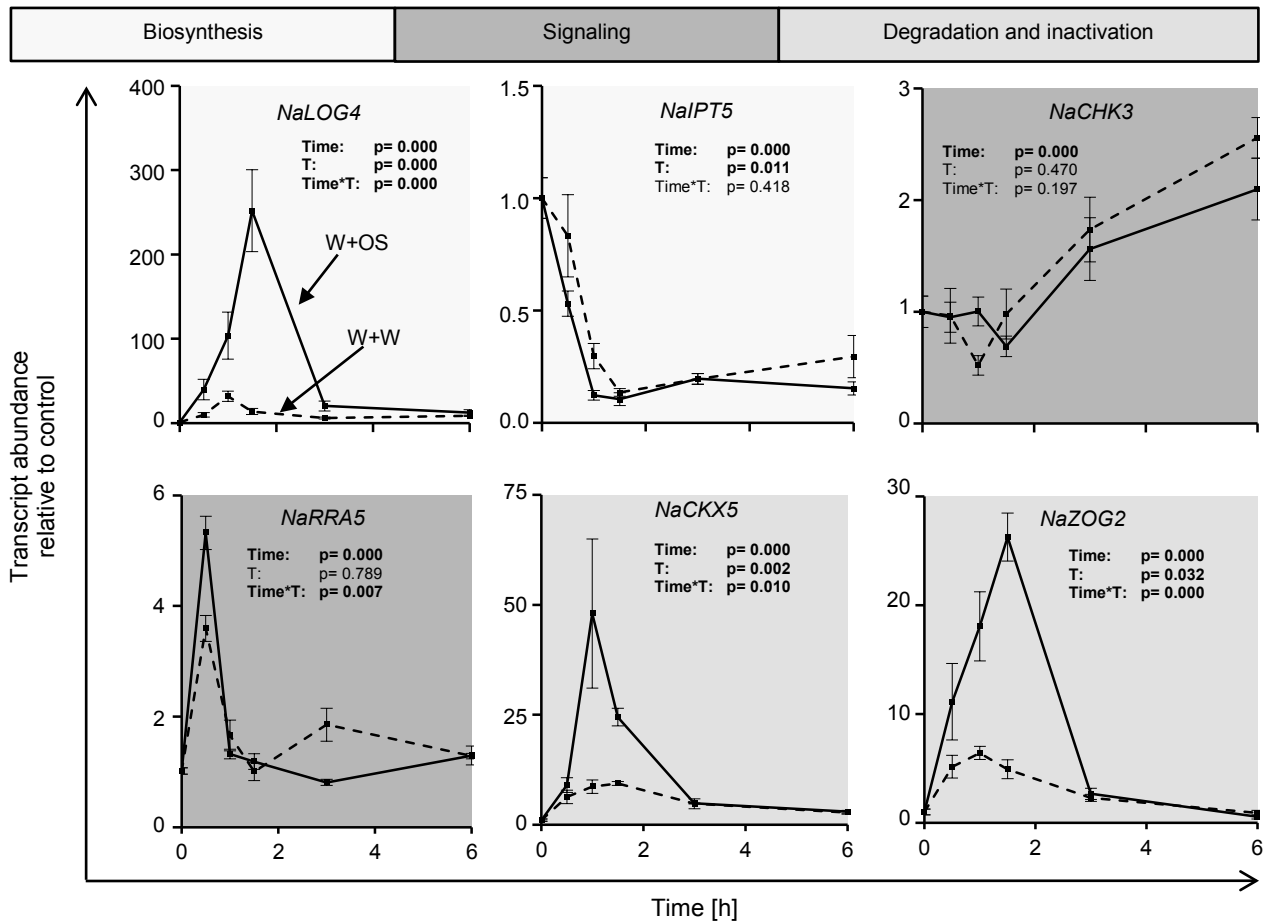

**Figure S9. Confirmation of microarray expression data.**

Relative transcript levels of cytokinin-related genes were measured in leaves of *N. attenuata* at different time points after wounding and application of water (W+W, dashed line) or *M. sexta* oral secretions (W+OS, solid line) to the puncture wounds by quantitative PCR. Time and treatment (C, W+W and W+OS; T) effects and their interaction (Time\*T) were analyzed by univariate ANOVA, except for *NaRRA5* and *NaZOG2* data which were analyzed by a generalized least squares model. Error bars are standard errors ( $N \geq 3$ ).

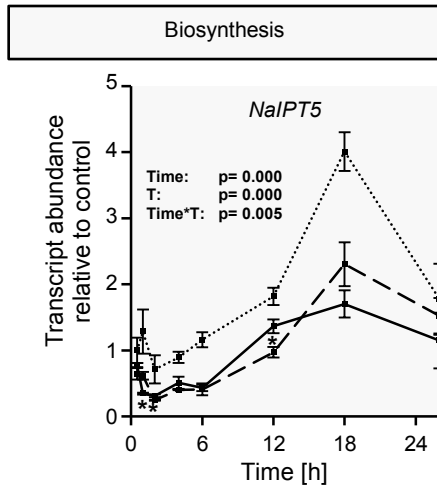

**Figure S10. Confirmation of *NaIPT5* microarray data.**

Relative transcript levels of isopentenyltransferases 5 (*NaIPT5*) were measured in leaves of *N. attenuata* at different time points (0.5, 1, 2, 4, 6, 12, 18 and 26 h) after wounding and application of water (W+W, dashed line) or *M. sexta* oral secretions (W+OS, solid line) to the puncture wounds, as well as in untreated control leaves (C; dotted line) by quantitative PCR. Time and treatment (C and W+OS; T) effects and their interaction (Time\*T) were analyzed by a generalized least squares model. Asterisks indicate significant differences between W+W and W+OS-treated samples at the same time point (independent samples *t* test: \*  $P \leq 0.05$ ). Samples from five plants per time and treatment were pooled and three technical replicates were measured. Error bars are standard errors (N=3).

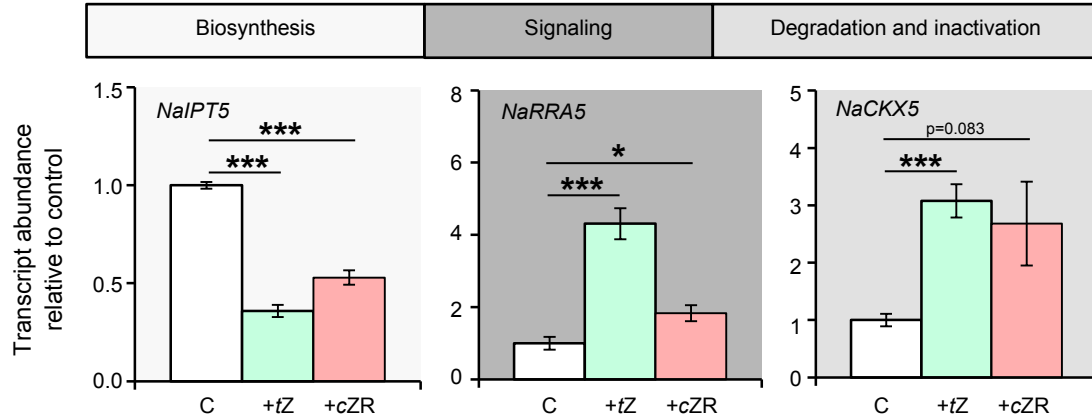

**Figure S11. Cytokinin-spraying changes *NaIPT5*, *NaRRA5* and *NaCKX5* transcript accumulation.**

Relative transcript accumulations of *NaIPT5*, *NaRRA5* and *NaCKX5* were measured in leaves of *N. attenuata* after three days of *trans*-zeatin (*tZ*; 1  $\mu$ M) or *cis*-zeatin riboside (*cZR*; 5  $\mu$ M)-spraying or spraying of the buffer control (C). Spraying was performed three times per day.

Asterisks indicate significant differences between *tZ/cZR*-sprayed samples compared to the control treatment (independent samples *t* test: \*  $P \leq 0.05$ , \*\*\*  $P \leq 0.001$ ). Error bars are standard errors (N=5).

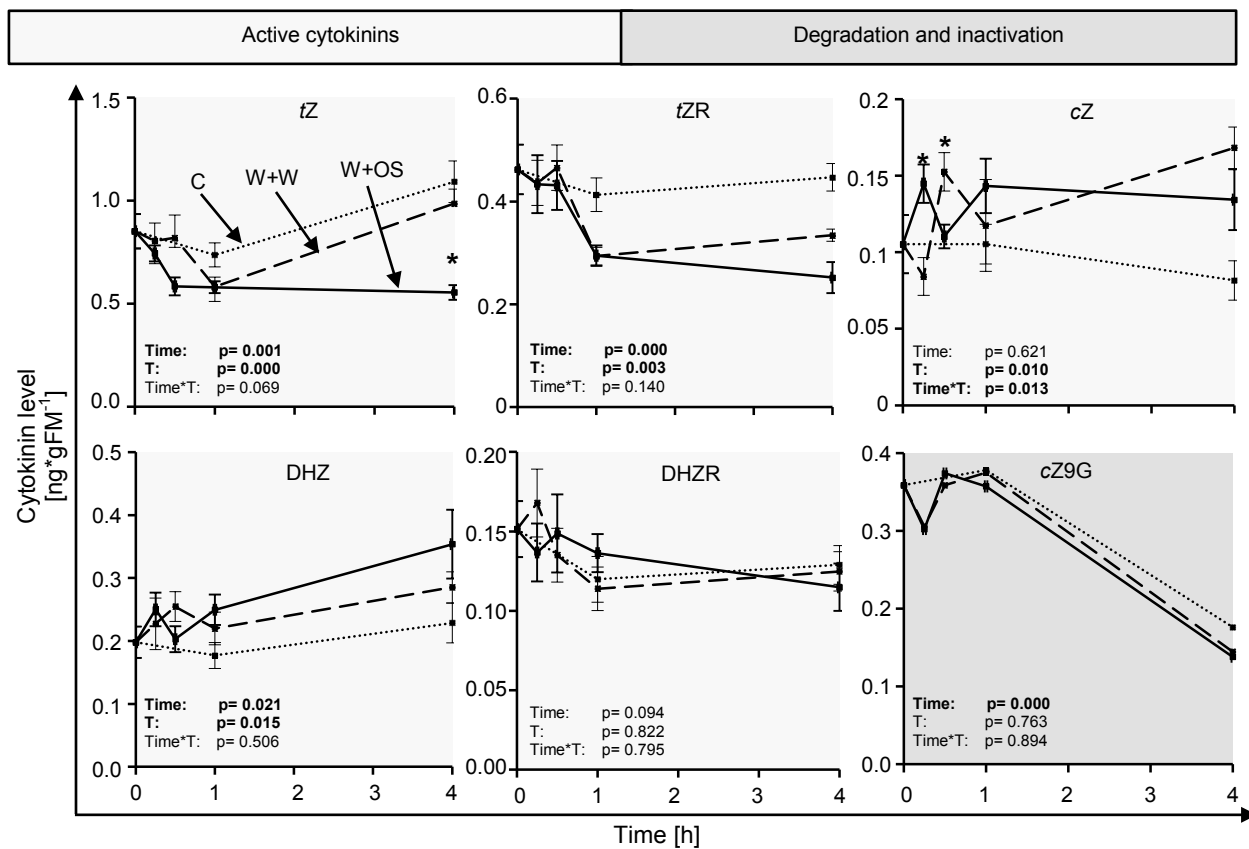

**Figure S12. Wounding and herbivory-induced changes in cytokinin levels.**

*trans*-Zeatin (*tZ*), *trans*-zeatin riboside (*tZR*), *cis*-Zeatin (*cZ*), dihydrozeatin (DHZ), dihydrozeatin riboside (DHZR) and *cis*-zeatin 9-glucoside (*cZ9G*) levels in leaves of *N. attenuata* at different time points after wounding and application of water (W+W, dashed line) or *M. sexta* oral secretions (W+OS, solid line) to the puncture wounds, as well as in untreated control leaves (C, dotted line). Time and treatment (C, W+W and W+OS; T) effects and their interaction (Time\*T) were analyzed by univariate ANOVA, except for *tZR* and *cZ9G* data which were analyzed by a generalized least squares model. Asterisks indicate significant differences between W+W and W+OS-treated samples at the same time point (independent samples *t* test: \*  $P \leq 0.05$ ). Error bars are standard errors (N=5). FM, fresh mass.

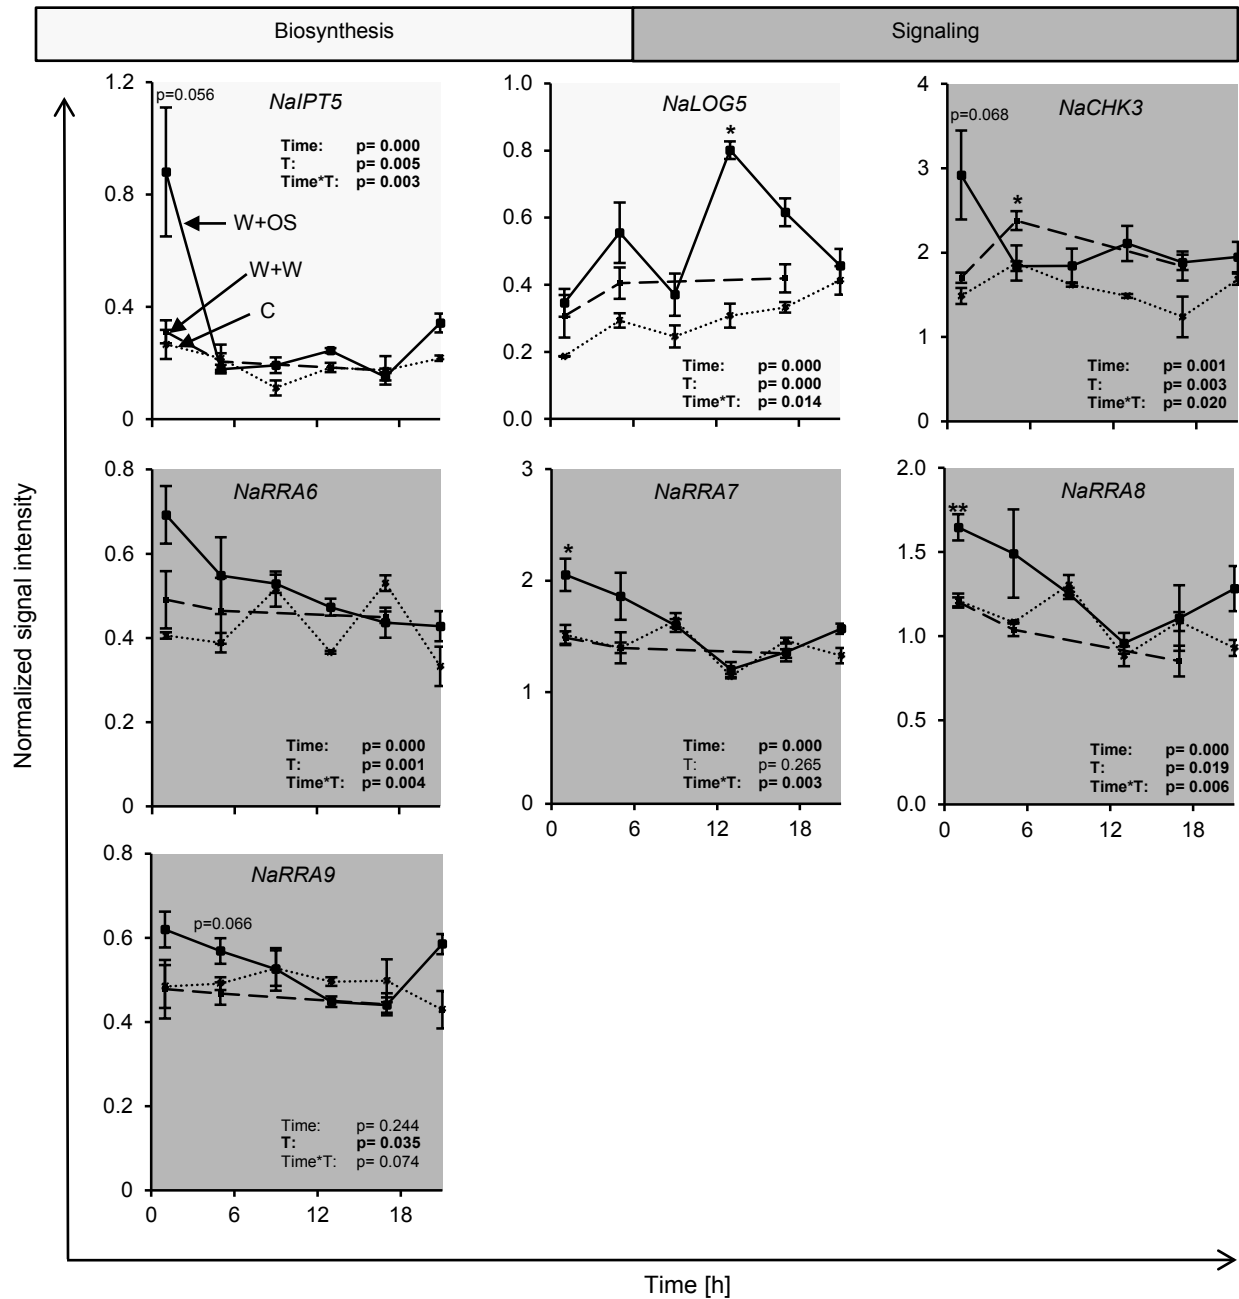

**Figure S13. Wounding and herbivory regulate transcript accumulation of cytokinin-related genes in the root.**

Transcript accumulation was measured in roots and systemic leaves of *N. attenuata* at different time points after wounding and application of water (W+W; dashed line; 1, 5 and 17 h) or *M. sexta* oral secretions (W+OS; solid line; 1, 5, 9, 13, 17 and 21 h) to the puncture wounds, as well as in untreated control leaves (C; dotted line; 1, 5, 9, 13, 17 and 21 h). Data are obtained from kinetic analysis conducted with microarrays.

Time and treatment (C and W+OS; T) effects and their interaction (Time\*T) were analyzed for *NaRRA9* by univariate ANOVA; the other transcript data were analyzed by a generalized least squares model. Asterisks indicate significant differences between W+W and W+OS-treated samples at the same time point (independent samples *t* test: \*  $P \leq 0.05$ , \*\*  $P \leq 0.01$ ). Error bars are standard errors (N=3).



|              |           |                              |
|--------------|-----------|------------------------------|
| Biosynthesis | Signaling | Degradation and inactivation |
|--------------|-----------|------------------------------|

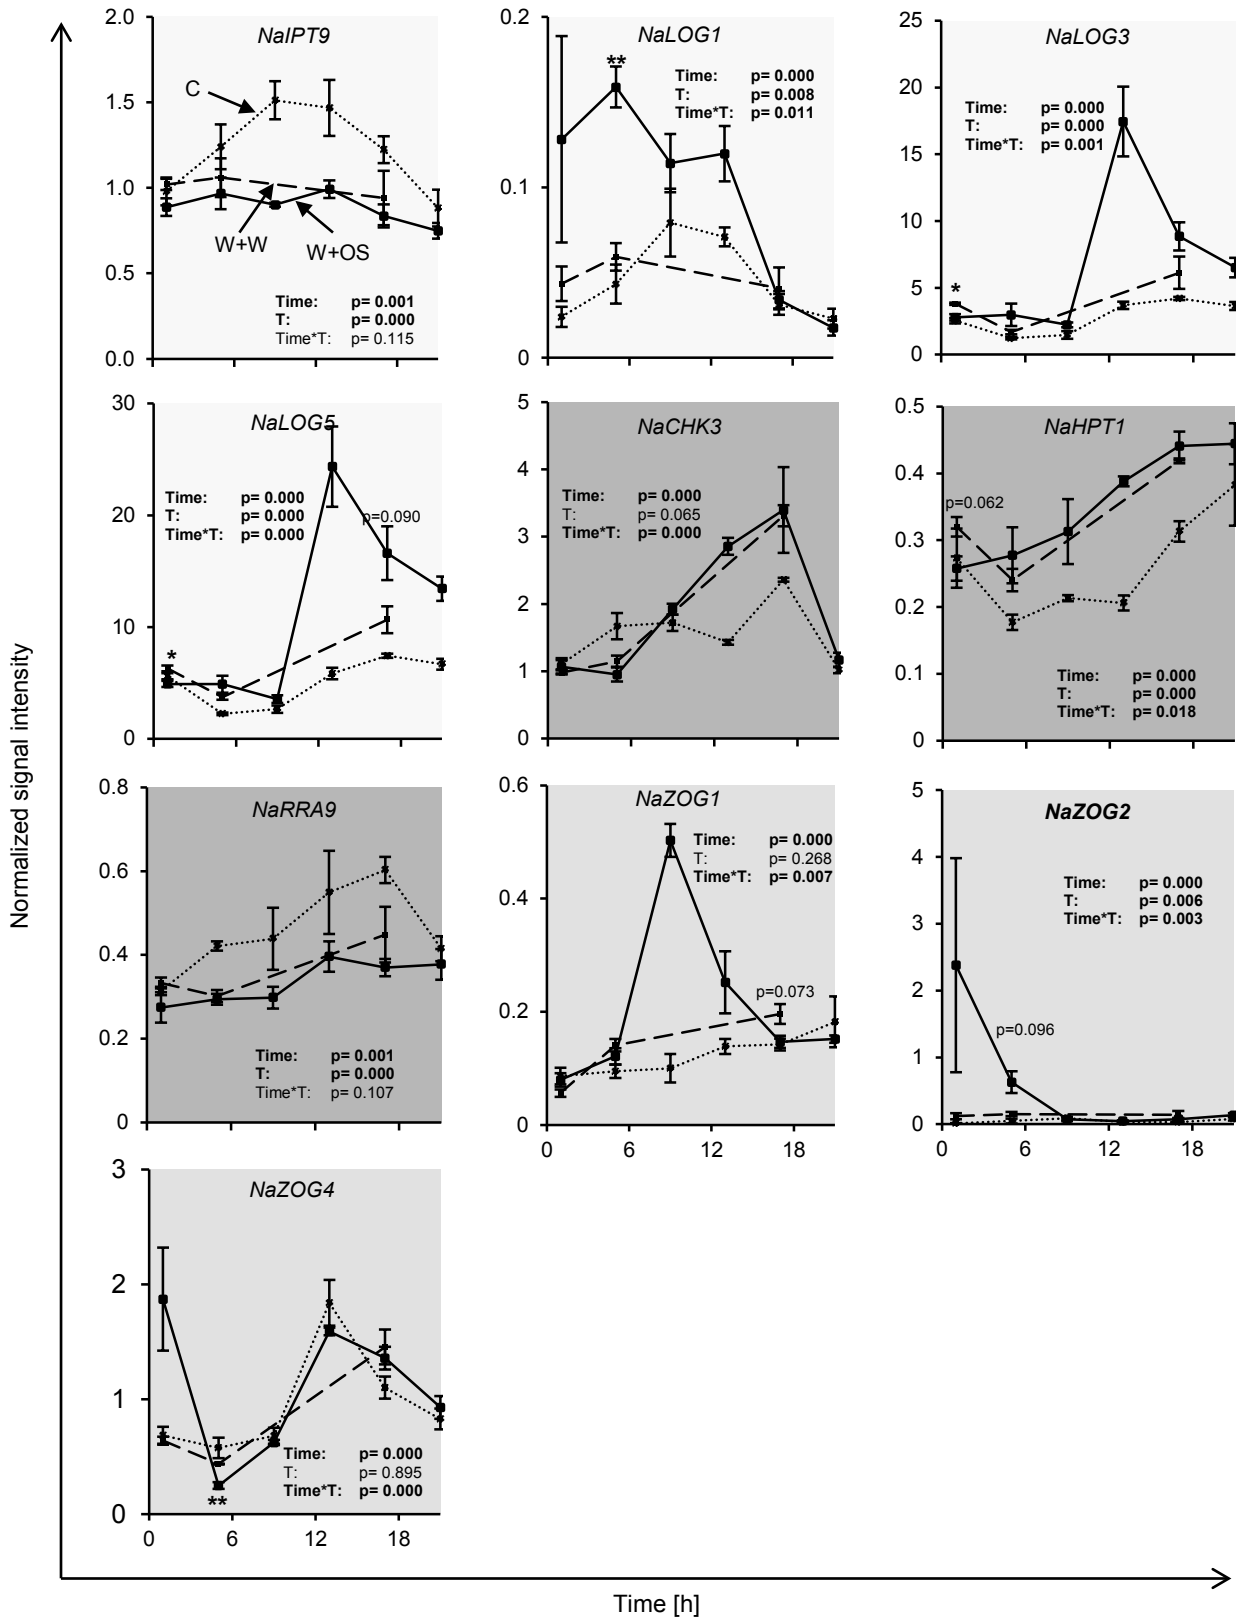

**Figure S14. Wounding and herbivory regulate transcript accumulation of cytokinin-related genes in systemic leaves.**

Transcript accumulation was measured in roots and systemic leaves of *N. attenuata* at different time points after wounding and application of water (W+W; dashed line; 1, 5 and 17 h) or *M. sexta* oral secretions (W+OS; solid line; 1, 5, 9, 13, 17 and 21 h) to the puncture wounds, as well as in untreated control leaves (C; dotted line; 1, 5, 9, 13, 17 and 21 h). Data are obtained from kinetic analysis conducted with microarrays.

Time and treatment (C and W+OS; T) effects and their interaction (Time\*T) were analyzed for *NalIPT9* by univariate ANOVA; the other transcript data were analyzed by a generalized least squares model. Asterisks indicate significant differences between W+W and W+OS-treated samples at the same time point (independent samples *t* test: \*\*  $P \leq 0.01$ ). Error bars are standard errors (N=3).

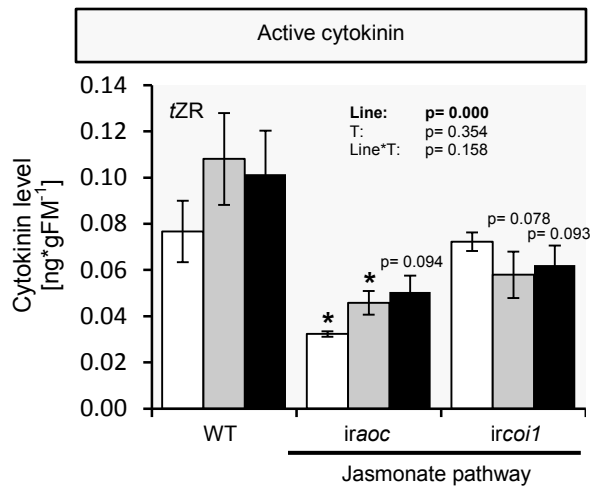

**Figure S15. *Trans*-zeatin riboside levels in jasmonic acid pathway impaired transgenic plants.**

*Trans*-zeatin riboside (*tZR*) levels in leaves of *N. attenuata* 30 min after wounding and application of water (W+W, grey bars) or *M. sexta* oral secretions (W+OS, solid bars) to the puncture wounds and in untreated control leaves (C, open bars). Measurements were performed in leaves of wild-type (WT) plants and RNAi lines silenced in *AOC* or *COI1* expression.

Line and treatment (C, W+W and W+OS; T) effects and their interaction (Line\*T) were analyzed by univariate ANOVA. Asterisks indicate significant differences between same treatments from RNAi lines and WT plants (independent samples *t* test: \* P≤0.05). Error bars are standard errors (N≥3). FM, fresh mass.

# Supplemental Tables

**Table S1. Abbreviations**

| Abbr.        | Definition                                                   | Abbr.            | Definition                                            |
|--------------|--------------------------------------------------------------|------------------|-------------------------------------------------------|
| AOC          | Allene oxide cyclase                                         | IP               | Isopentenyladenine                                    |
| CHASE        | Cyclase/histidine kinase<br>extracellular associated sensing | IPR              | Isopentenyladenosine                                  |
| CHK          | CHASE domain-containing<br>histidine kinase                  | IPT              | Isopentenyltransferase                                |
| CIG2         | Cytokinin-induced gene 2                                     | JA               | Jasmonic acid                                         |
| CK           | Cytokinin                                                    | JA-Ile           | Jasmonic acid-isoleucine conjugate                    |
| CKX          | Cytokinin oxidase/dehydrogenase                              | JAZ              | Jasmonate zim-domain                                  |
| COI1         | Coronatine insensitive 1                                     | MeJA             | Methyl-jasmonate                                      |
| CRK1         | Cytokinin-regulated kinase 1                                 | OS               | Oral secretion                                        |
| <i>cZ</i>    | <i>Cis</i> -zeatin                                           | OS <sub>GH</sub> | Grasshopper oral secretion                            |
| <i>cZ9G</i>  | <i>Cis</i> -zeatin <i>N</i> <sup>9</sup> -glucoside          | RR               | Response regulator                                    |
| <i>cZR</i>   | <i>Cis</i> -zeatin riboside                                  | RRA              | Type-A response regulator                             |
| <i>cZROG</i> | <i>Cis</i> -zeatin riboside <i>O</i> -glucoside              | RRB              | Type-B response regulator                             |
| DHZ          | Dihydrozeatin                                                | <i>tZ</i>        | <i>Trans</i> -zeatin                                  |
| DHZR         | Dihydrozeatin riboside                                       | <i>tZ7G</i>      | <i>Trans</i> -zeatin <i>N</i> <sup>7</sup> -glucoside |
| FAC          | Fatty acid-amino acid conjugate                              | <i>tZR</i>       | <i>Trans</i> -zeatin riboside                         |
| HAMP         | Herbivore-associated molecular<br>pattern                    | <i>tZROG</i>     | <i>Trans</i> -zeatin riboside <i>O</i> -glucoside     |
| HPT          | Histidine-containing<br>phosphotransfer protein              | W+OS             | Wounding and application of oral<br>secretion         |
|              |                                                              | W+W              | Wounding and water                                    |
|              |                                                              | ZOG              | Zeatin <i>O</i> -glucosyltransferase                  |

**Table S2. Sequences of primers used for qPCR.**

| Gene           | forward primer                 | reverse primer                 |
|----------------|--------------------------------|--------------------------------|
| <i>NaActin</i> | 5'ggcgtaccaccggtattgtg3'       | 5'gtcaagacggagaatggcatg3'      |
| <i>NaLOG4</i>  | 5'ctcagctcacaagctcttcacg3'     | 5'ccattaagccaacactccacc3'      |
| <i>NaIPT5</i>  | 5'tcagccacttattaattccgagag3'   | 5'tggctagatcaatggatagtctag3'   |
| <i>NaRRA5</i>  | 5'agatgagttgcatgttcttgctgt3'   | 5'tcaatccccacagaggcttct3'      |
| <i>NaCKX5</i>  | 5'tgtcggcttattgtaaccgctc3'     | 5'gtaagaactgccatcggtc3'        |
| <i>NaZOG2</i>  | 5'agtcatgcaagtcaatttaagagctc3' | 5'aggaaattgggaagaagggtgaag3'   |
| <i>NaCHK3</i>  | 5'tgctctccggagaggaagatc3'      | 5'ttagaaggaagatcggtttgtaaact3' |

**Table S3. Multi-reaction-monitoring settings for cytokinin quantification in positive ionization mode.**

| Analyte                          | Q1 [m/z] → | Q3 [m/z] | DP  | CE | CXP | Internal Standard                           |
|----------------------------------|------------|----------|-----|----|-----|---------------------------------------------|
| <i>t</i> Z                       | 220.2      | 136.3    | 26  | 25 | 16  | [ <sup>2</sup> H5] <i>t</i> Z               |
| <i>t</i> ZR                      | 352.2      | 220.3    | 76  | 25 | 30  | [ <sup>2</sup> H5] <i>t</i> ZR              |
| <i>t</i> ZROG                    | 514.1      | 382.1    | 96  | 25 | 16  | [ <sup>2</sup> H5] <i>t</i> ZROG            |
| <i>t</i> Z7G                     | 382.1      | 220.2    | 71  | 31 | 16  | [ <sup>2</sup> H5] <i>t</i> Z7G             |
| <i>c</i> Z                       | 220.2      | 136.3    | 26  | 25 | 16  | [ <sup>2</sup> H5] <i>t</i> Z               |
| <i>c</i> ZR                      | 352.2      | 220.3    | 76  | 25 | 30  | [ <sup>2</sup> H5] <i>t</i> ZR              |
| <i>c</i> ZROG                    | 514.1      | 382.1    | 96  | 25 | 16  | [ <sup>2</sup> H5] <i>t</i> ZROG            |
| <i>c</i> Z9G                     | 382.1      | 220.0    | 71  | 31 | 16  | [ <sup>2</sup> H5] <i>t</i> Z9G             |
| IP                               | 204.1      | 136.0    | 81  | 23 | 16  | [ <sup>2</sup> H6]IPR <sup>a</sup>          |
| IPR                              | 336.1      | 204.3    | 61  | 23 | 26  | [ <sup>2</sup> H6]IPR                       |
| DHZ                              | 222.0      | 136.0    | 76  | 27 | 20  | [ <sup>2</sup> H5] <i>t</i> Z <sup>b</sup>  |
| DHZR                             | 354.2      | 220.1    | 101 | 29 | 18  | [ <sup>2</sup> H5] <i>t</i> ZR <sup>c</sup> |
| [ <sup>2</sup> H5] <i>t</i> Z    | 225.2      | 136.3    | 26  | 25 | 16  |                                             |
| [ <sup>2</sup> H5] <i>t</i> ZR   | 357.2      | 225.3    | 76  | 25 | 30  |                                             |
| [ <sup>2</sup> H5] <i>t</i> ZROG | 519.1      | 387.1    | 96  | 25 | 16  |                                             |
| [ <sup>2</sup> H5] <i>t</i> Z7G  | 387.1      | 225.0    | 71  | 31 | 16  |                                             |
| [ <sup>2</sup> H5] <i>t</i> Z97G | 387.1      | 225.0    | 71  | 31 | 16  |                                             |
| [ <sup>2</sup> H6]IPR            | 342.0      | 210.1    | 61  | 23 | 26  |                                             |

<sup>a</sup> Reference factor →  $m_{IP} = 8.772 \times m_{D6-IPR}$

<sup>b</sup> Reference factor →  $m_{DHZ} = 0.6029 \times m_{D5-tZ}$

<sup>c</sup> Reference factor →  $m_{DHZR} = 0.5525 \times m_{D5-tZR}$
